# Supplementary material for: Sulfonated reduced graphene oxide catalyzed cyclization of hydrazides and carbon dioxide to 1,3,4-oxadiazoles under sonication
Source: PubMed Central journal article supplement (PMC5498654; doi:10.1038/s41598-017-04143-4), 2017-07-05

**Supplementary information**

**Sulfonated reduced graphene oxide catalyzed cyclization of hydrazides and carbon dioxide to 1,3,4-oxadiazoles under sonication**

Manuri Brahmayya, Shenghong A Dai, Shing-Yi Suen\*

Department of Chemical Engineering, National Chung Hsing University, 250 KuoKuang Raod  
250, Taichung, Taiwan, R.O.C

Correspondence author : *E-mail:* [sysuen@dragon.nchu.edu.tw](mailto:sysuen@dragon.nchu.edu.tw)

Table S1. Cyclization of 4-methyl benzohydrazide under various conditions.

| Temperature / Sonication    | Time (h)   | 5 wt% catalyst loading |       | 20 wt% catalyst loading |       | 50 wt% catalyst loading |       |
|-----------------------------|------------|------------------------|-------|-------------------------|-------|-------------------------|-------|
|                             |            | PhCONHNH <sub>2</sub>  | POxdO | PhCONHNH <sub>2</sub>   | POxdO | PhCONHNH <sub>2</sub>   | POxdO |
| <b>25 °C / Conventional</b> | 3          | 100                    | 0     | 93.4                    | 6.6   | 91.6                    | 8.4   |
|                             | 6          | 100                    | 0     | 87.2                    | 12.8  | 85.5                    | 14.5  |
|                             | 24         | 99.8                   | 0     | 78.8                    | 20.2  | 79.2                    | 20.8  |
|                             | 48         | 99.0                   | 1.0   | 76.6                    | 23.4  | 75.0                    | 25.0  |
|                             | 72         | 99.0                   | 1.0   | 71.3                    | 28.7  | 69.9                    | 30.1  |
|                             | 96         | 98.1                   | 1.8   | 63.7                    | 36.3  | 61.7                    | 38.3  |
|                             | Time (min) | 5 wt% catalyst loading |       | 20 wt% catalyst loading |       | 50 wt% catalyst loading |       |
|                             |            | PhCONHNH <sub>2</sub>  | POxdO | PhCONHNH <sub>2</sub>   | POxdO | PhCONHNH <sub>2</sub>   | POxdO |
| <b>25 °C / Sonication</b>   | 10         | 99.0                   | 1.0   | 93.0                    | 7.0   | 92.3                    | 7.7   |
|                             | 30         | 94.5                   | 5.5   | 83.6                    | 16.4  | 81.2                    | 18.8  |
|                             | 50         | 94.0                   | 6.0   | 69.7                    | 30.3  | 65.0                    | 35.0  |
|                             | 60         | 93.0                   | 7.0   | 66.0                    | 34.0  | 63.6                    | 36.4  |
|                             | 90         | 92.8                   | 7.2   | 63.2                    | 36.8  | 62.1                    | 37.9  |
|                             | 120        | 92.8                   | 7.1   | 61.0                    | 39.0  | 60.0                    | 40    |
| <b>40 °C / Sonication</b>   | 10         | 98.0                   | 2.0   | 89.9                    | 10.1  | 88.2                    | 11.8  |
|                             | 30         | 97.4                   | 2.6   | 81.8                    | 18.2  | 76.8                    | 23.2  |
|                             | 50         | 92.6                   | 7.4   | 67.5                    | 32.5  | 63.0                    | 37.0  |
|                             | 60         | 91.8                   | 8.2   | 63.9                    | 36.1  | 62.2                    | 37.8  |
|                             | 90         | 91.0                   | 8.2   | 63.0                    | 37.0  | 61.0                    | 39.0  |
|                             | 120        | 92.0                   | 8.0   | 60.6                    | 39.4  | 60.4                    | 39.6  |
| <b>50 °C / Sonication</b>   | 10         | 97.0                   | 3.0   | 89.1                    | 10.9  | 88.0                    | 12.0  |
|                             | 30         | 93.0                   | 7.0   | 74.5                    | 25.5  | 73.0                    | 27.0  |
|                             | 50         | 90.1                   | 9.9   | 62.0                    | 38.0  | 70.2                    | 29.8  |
|                             | 60         | 90.0                   | 9.0   | 59.7                    | 40.3  | 68.1                    | 41.9  |
|                             | 90         | 90.3                   | 9.7   | 59.0                    | 41.0  | 57.7                    | 42.3  |
|                             | 120        | 90.7                   | 9.3   | 58.9                    | 41.1  | 57.2                    | 42.8  |
| <b>75 °C / Sonication</b>   | 10         | 97.1                   | 1.9   | 91.2                    | 9.8   | 89.5                    | 10.5  |
|                             | 30         | 92.8                   | 1.5   | 83.2                    | 16.8  | 79.8                    | 20.2  |
|                             | 50         | 93.6                   | 6.4   | 70.0                    | 30.0  | 70.0                    | 30.0  |
|                             | 60         | 90.3                   | 9.7   | 72.4                    | 27.6  | 69.3                    | 30.7  |
|                             | 90         | 90.6                   | 9.4   | 73.6                    | 26.4  | 70.0                    | 30.0  |
|                             | 120        | 90.8                   | 8.2   | 74.0                    | 26.0  | 71.0                    | 29.0  |
| <b>100 °C / Sonication</b>  | 10         | 98.0                   | 4.0   | 92.0                    | 8.0   | 91.0                    | 9.0   |
|                             | 30         | 96.2                   | 4.0   | 87.0                    | 13.0  | 85.0                    | 15.0  |
|                             | 50         | 95.1                   | 4.9   | 79.1                    | 20.9  | 77.7                    | 22.3  |
|                             | 60         | 95.0                   | 5.0   | 79.6                    | 20.4  | 78.1                    | 21.9  |
|                             | 90         | 95.0                   | 9.7   | 80.9                    | 19.1  | 80.0                    | 20.0  |
|                             | 120        | 96.0                   | 9.3   | 81.3                    | 18.7  | 80.2                    | 19.8  |

<sup>a</sup> All reactions employed in sealed, Teflon-lined 25 mL round bottomed flasks. Aliquots were picked out at time intervals listed in the table s1. The products were extracted in DMSO-d<sub>6</sub> (1 mL) and separated from the nano catalyst by the syringe filtration (0.2 μm PTFE). Conversions were checked by integration of the hydrazide peak (CONHNH) of 4-methyl benzohydrazide or the ortho cyclic 1,3,4-oxadiazole of CONH.

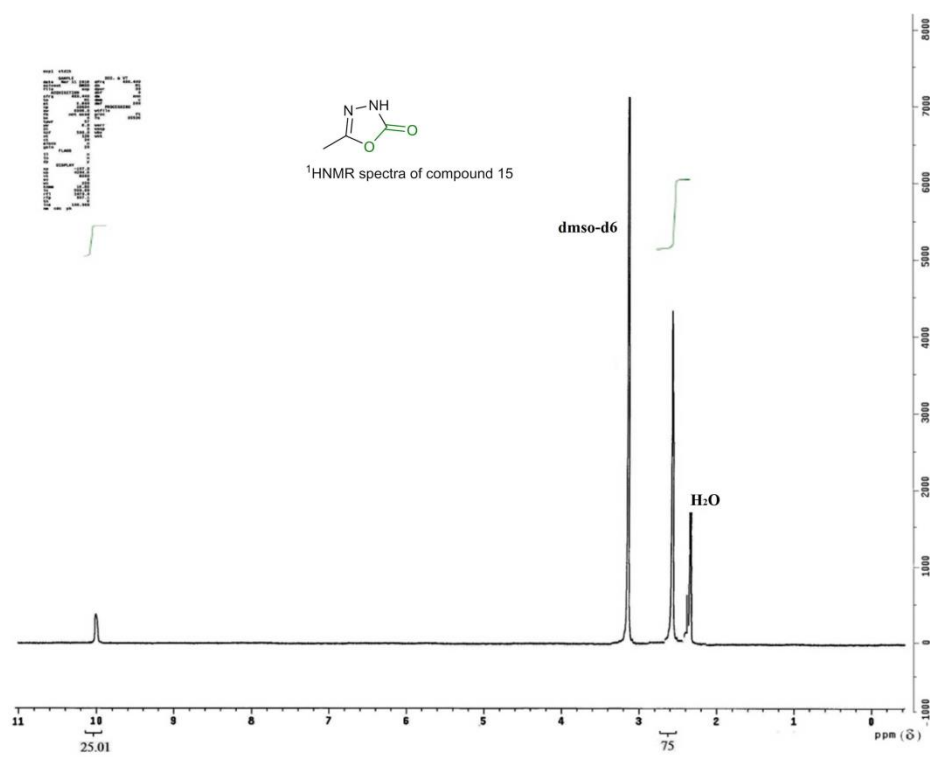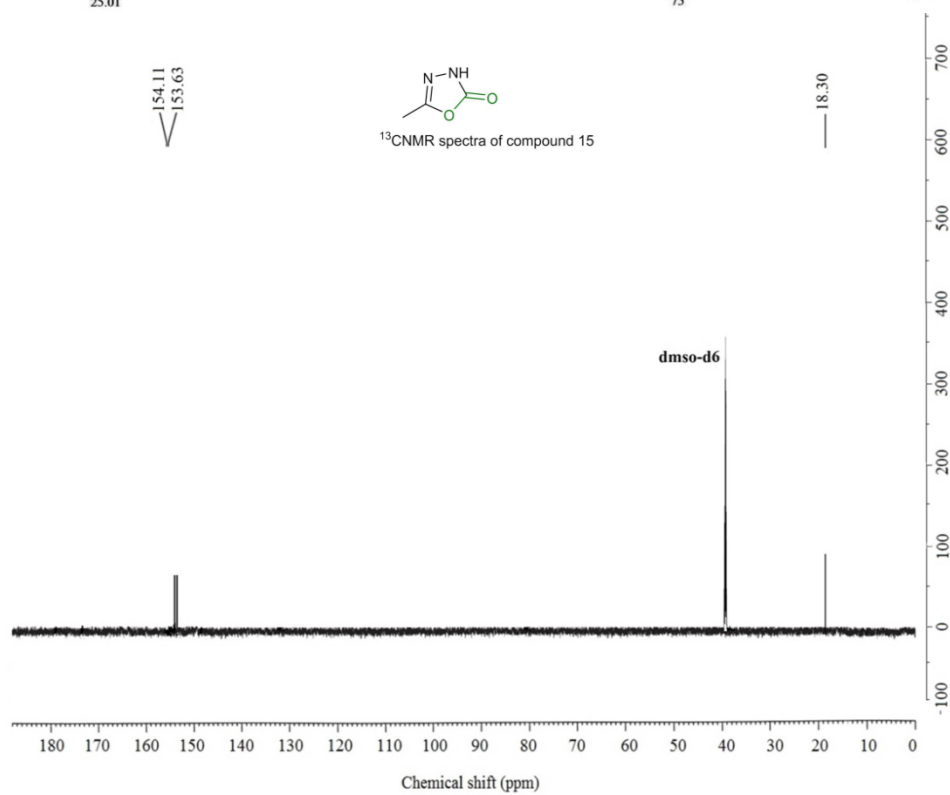

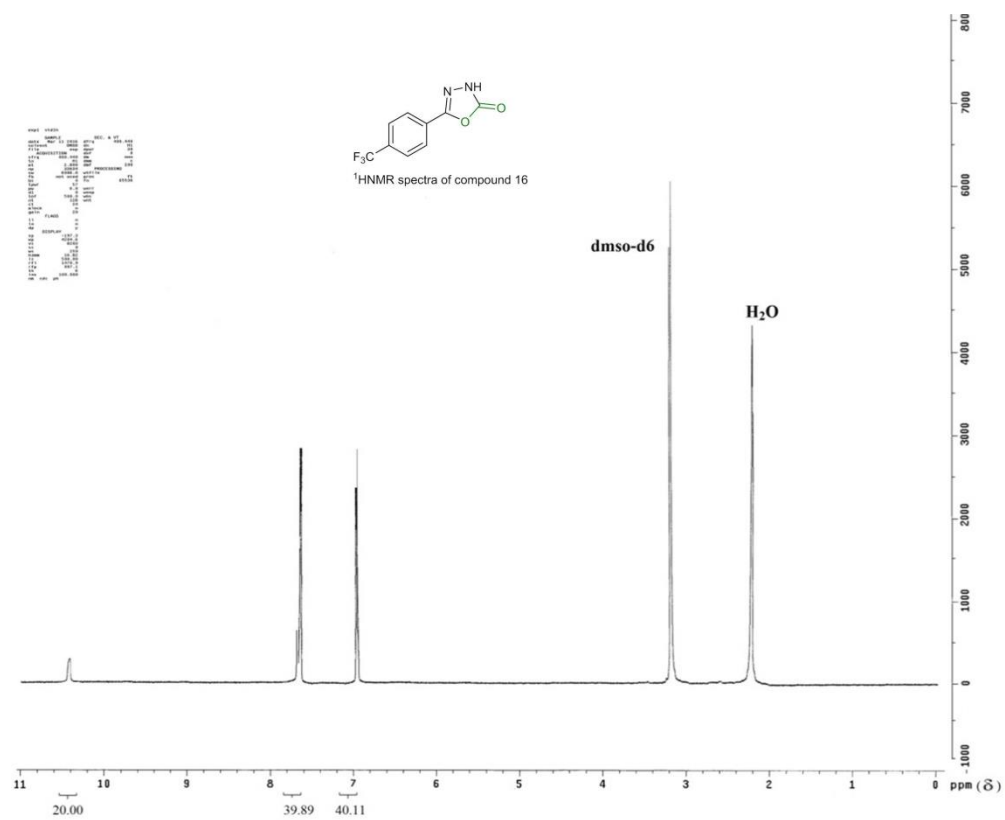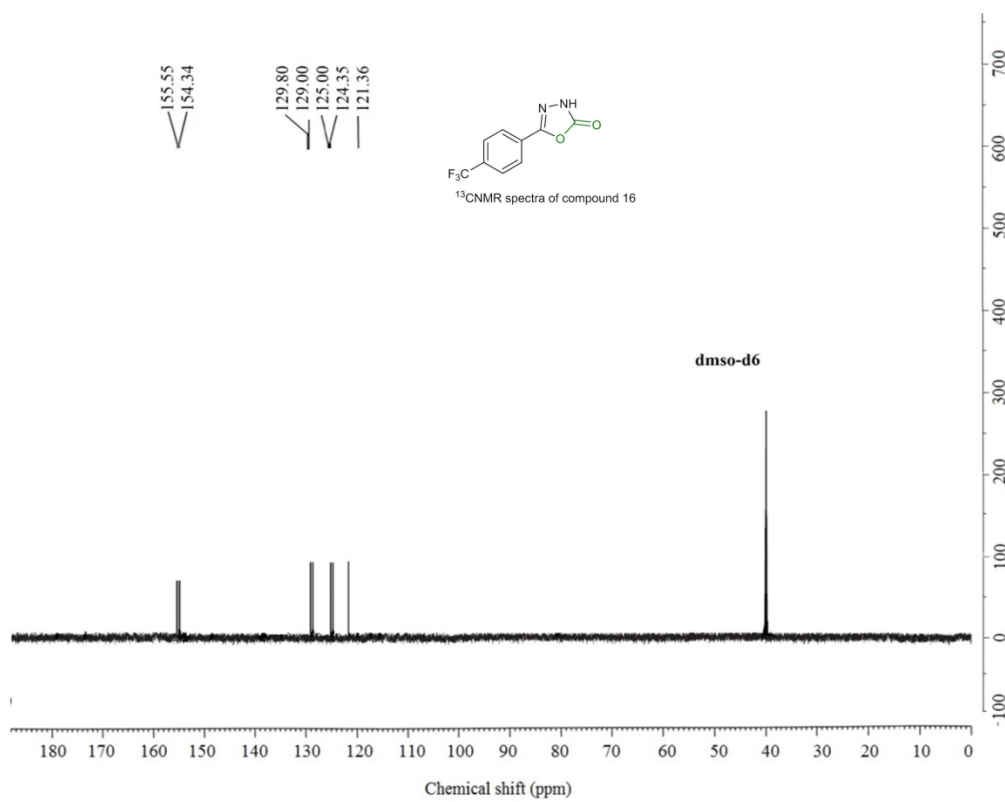

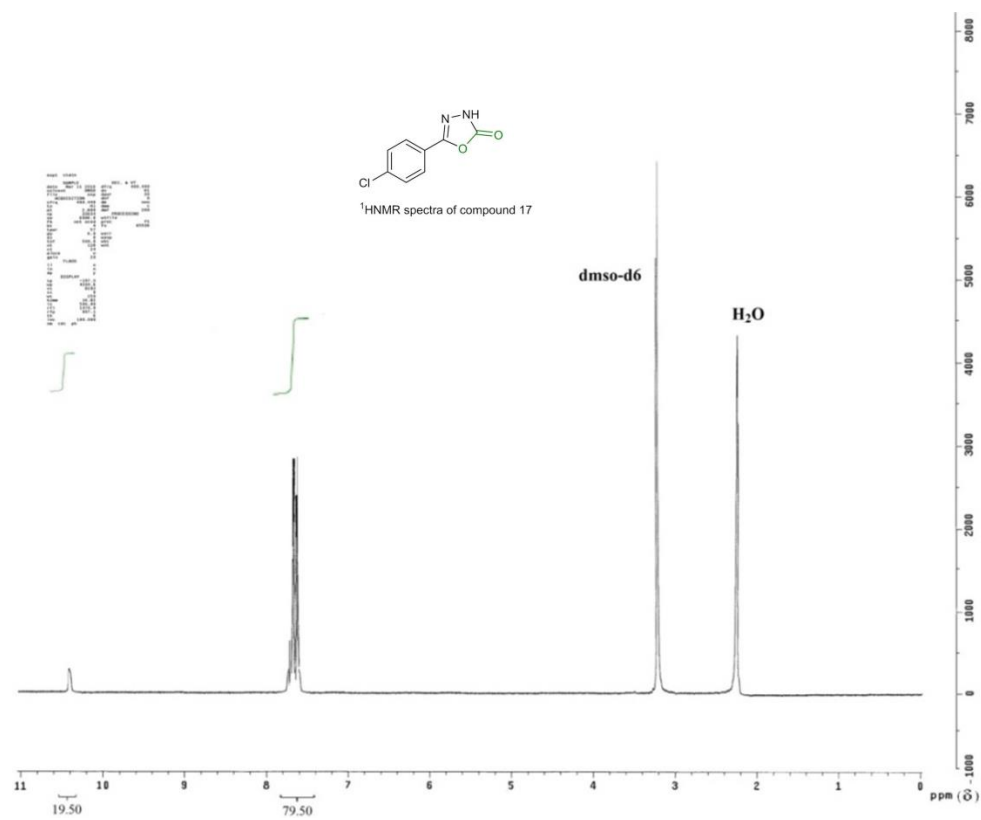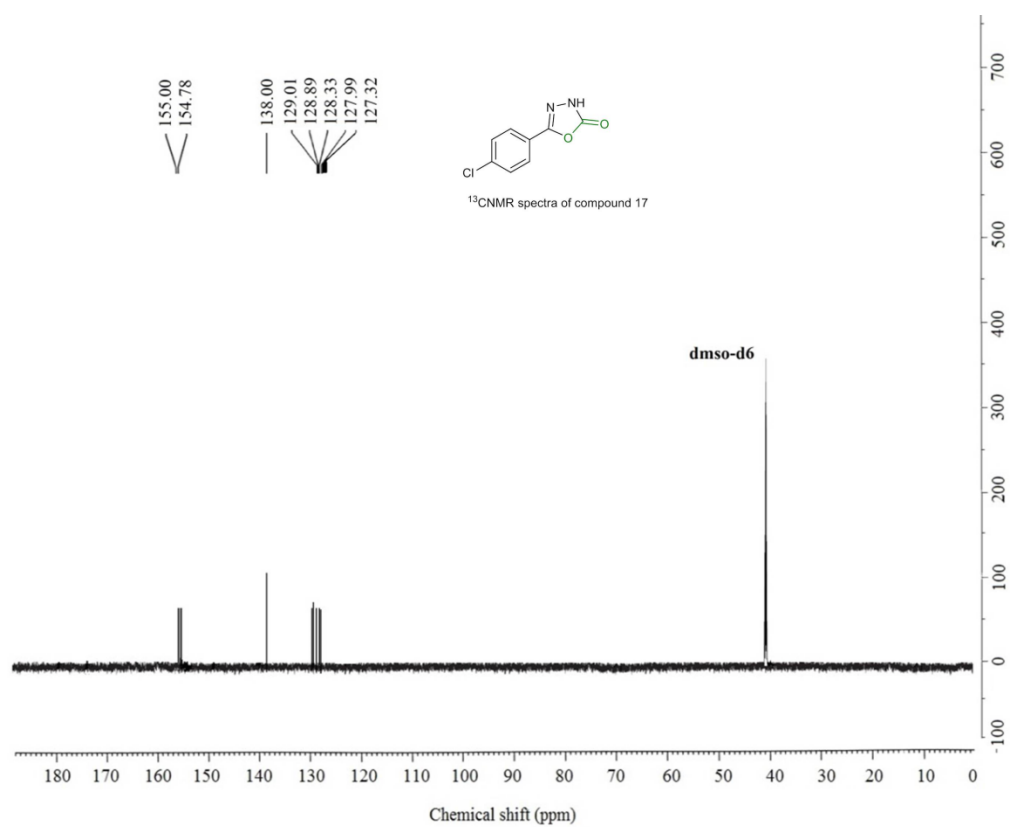

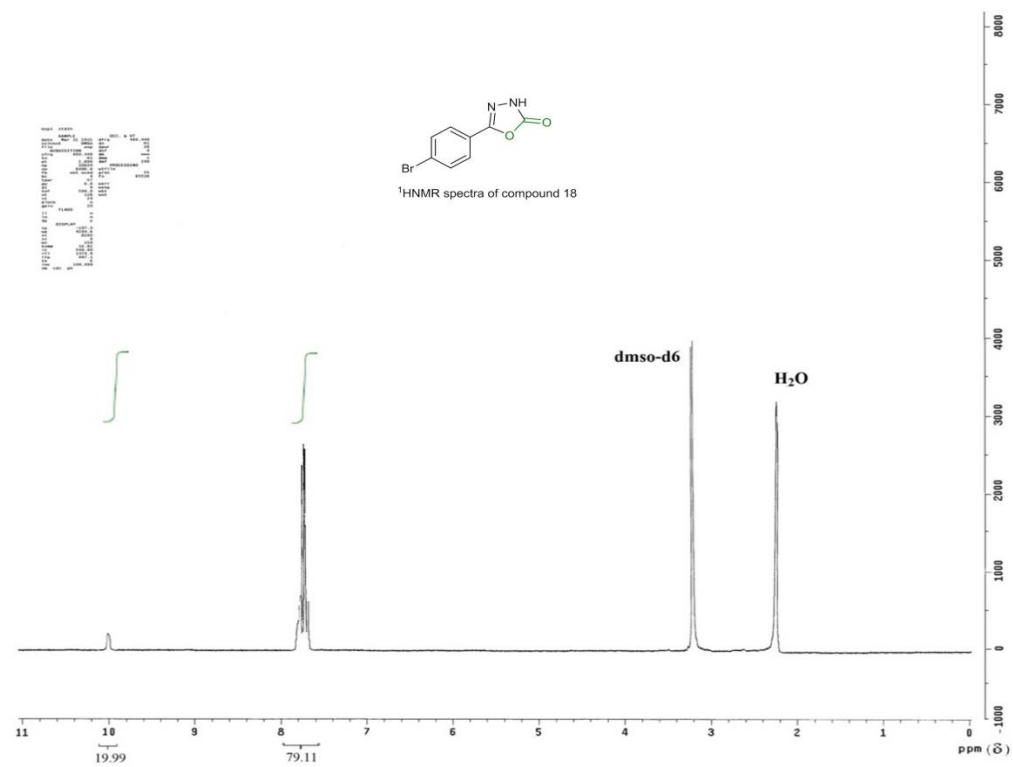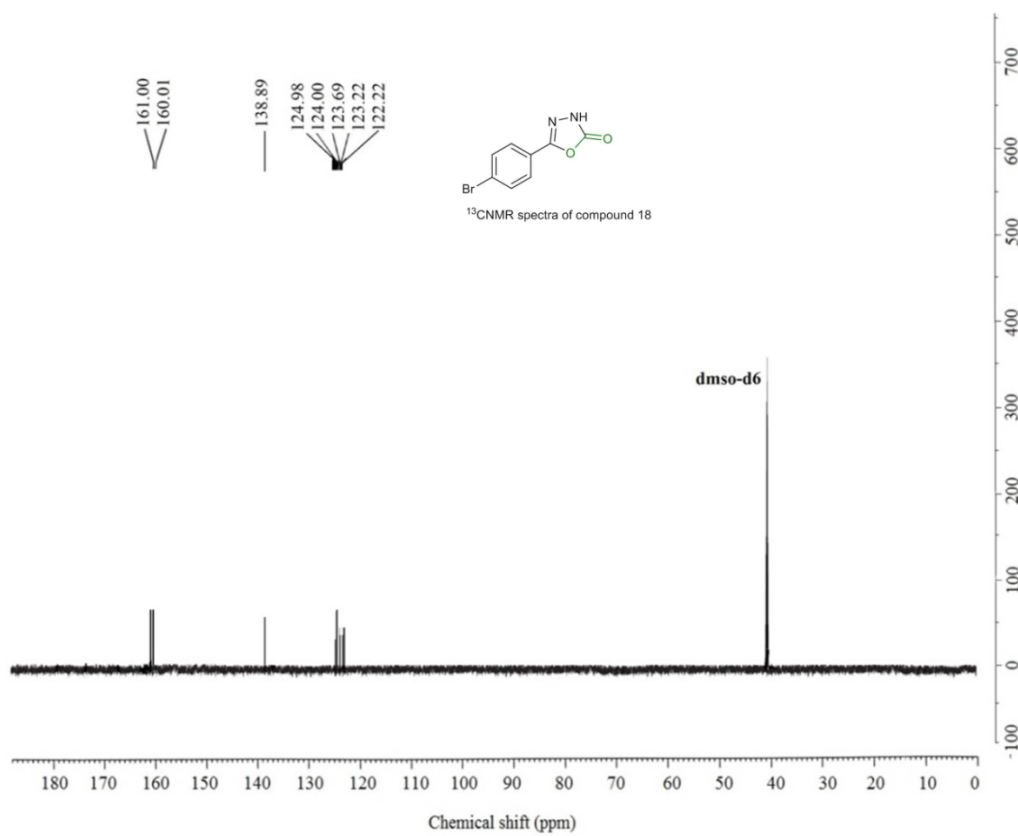



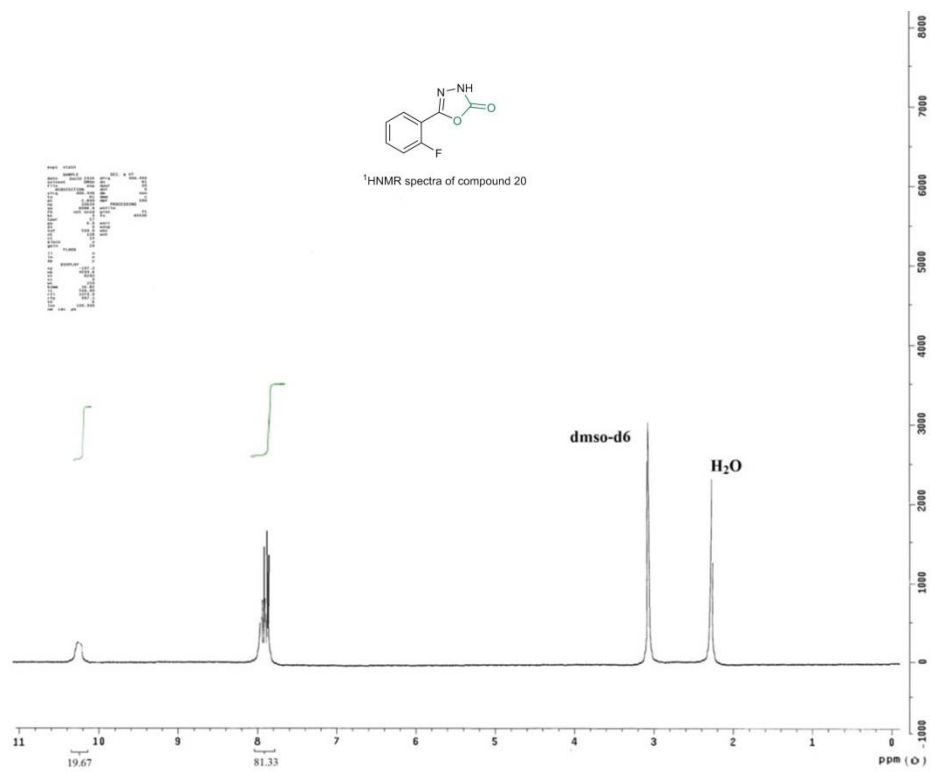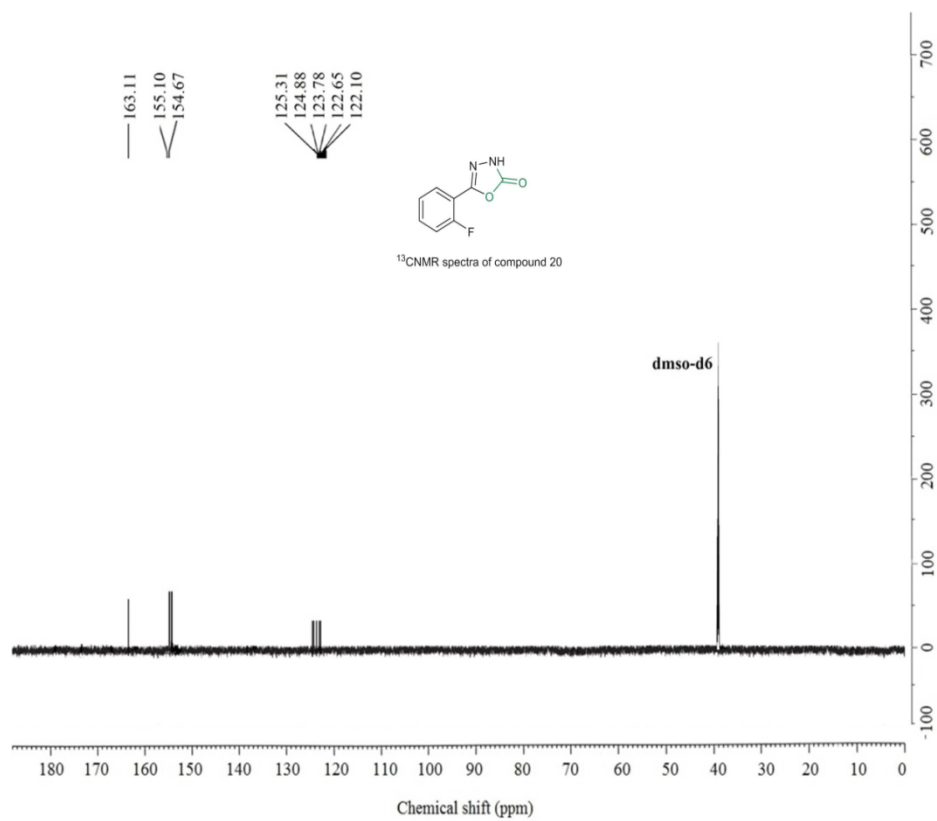



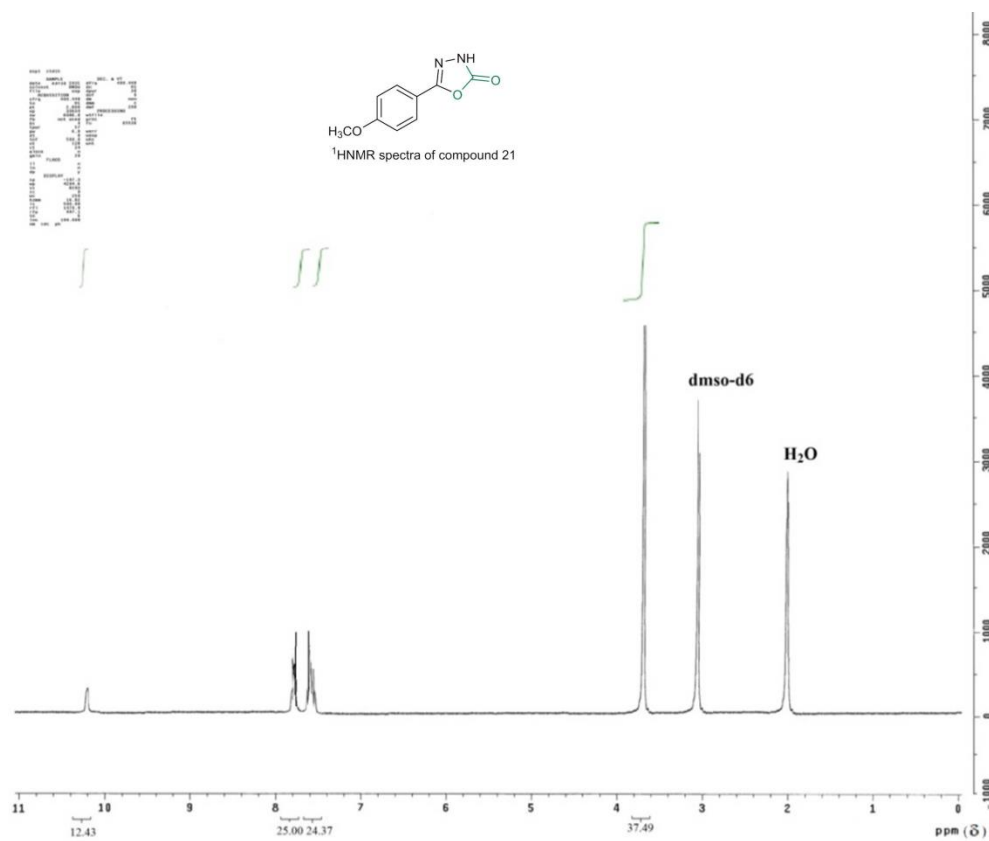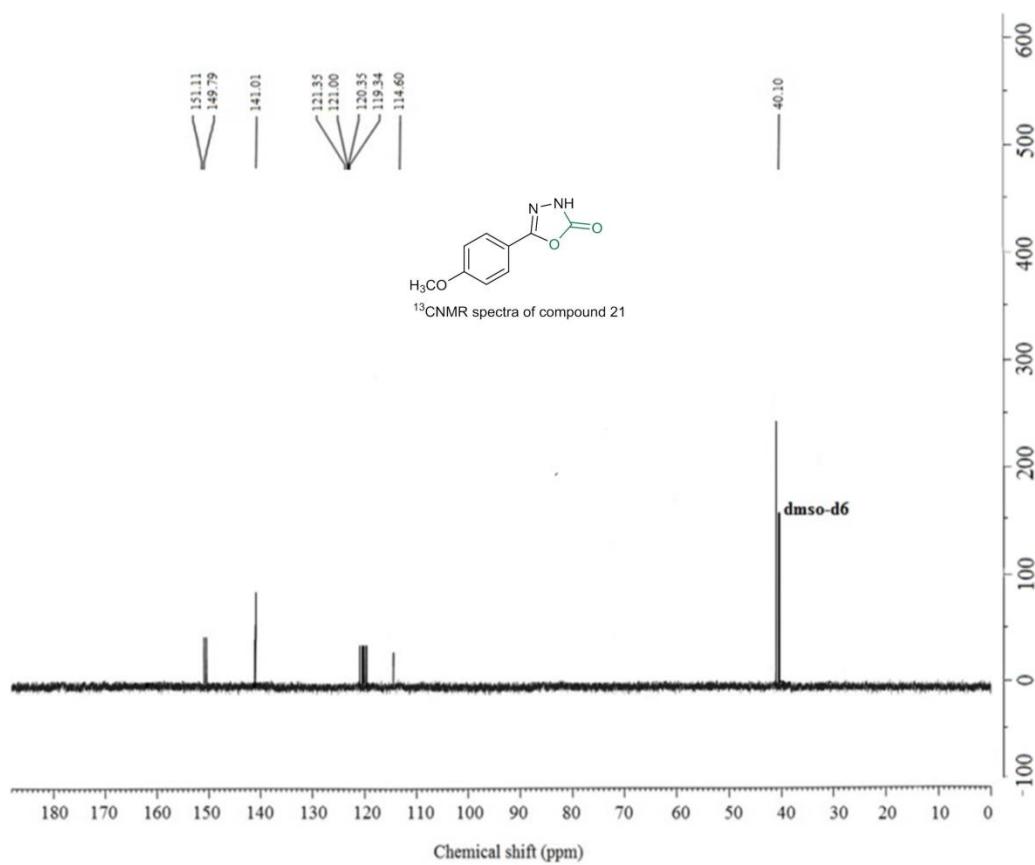

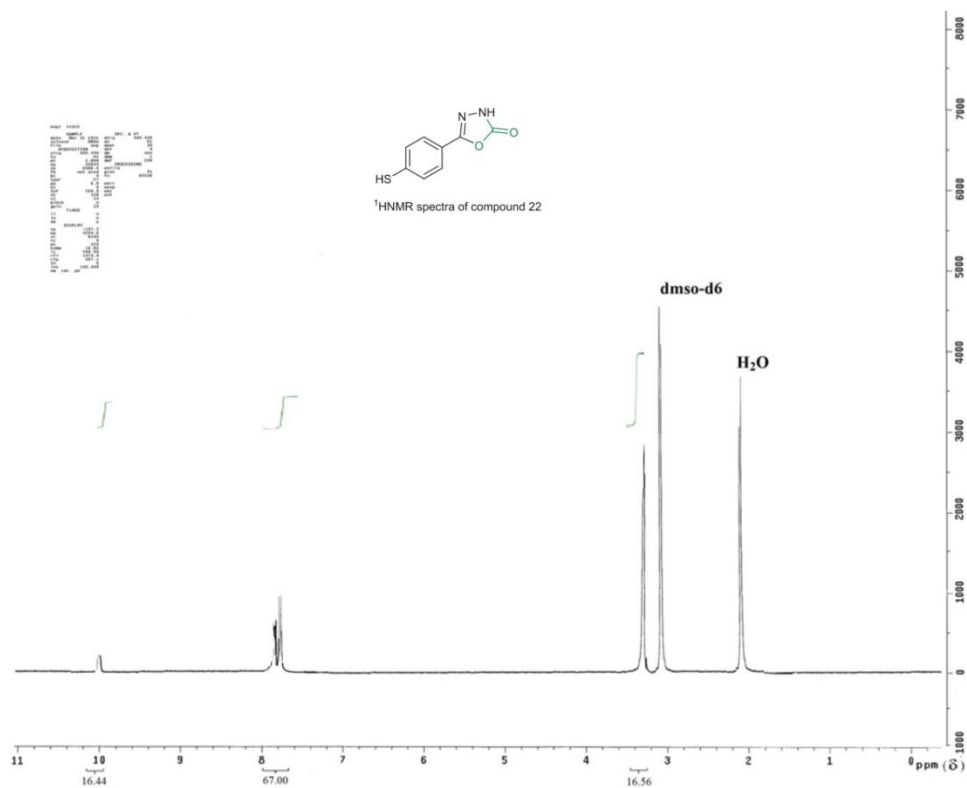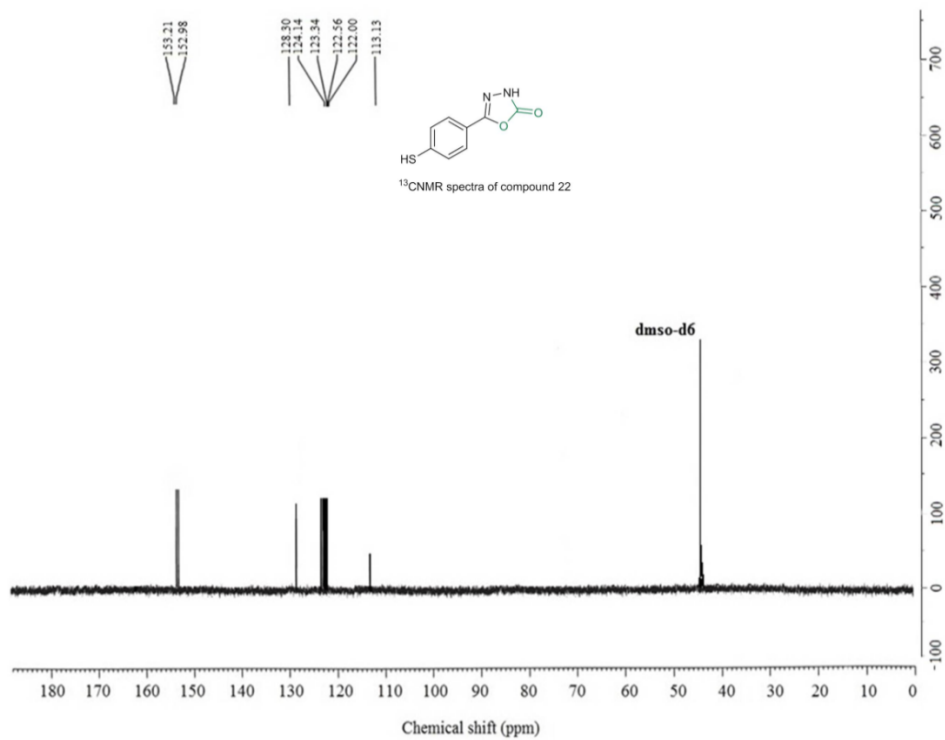

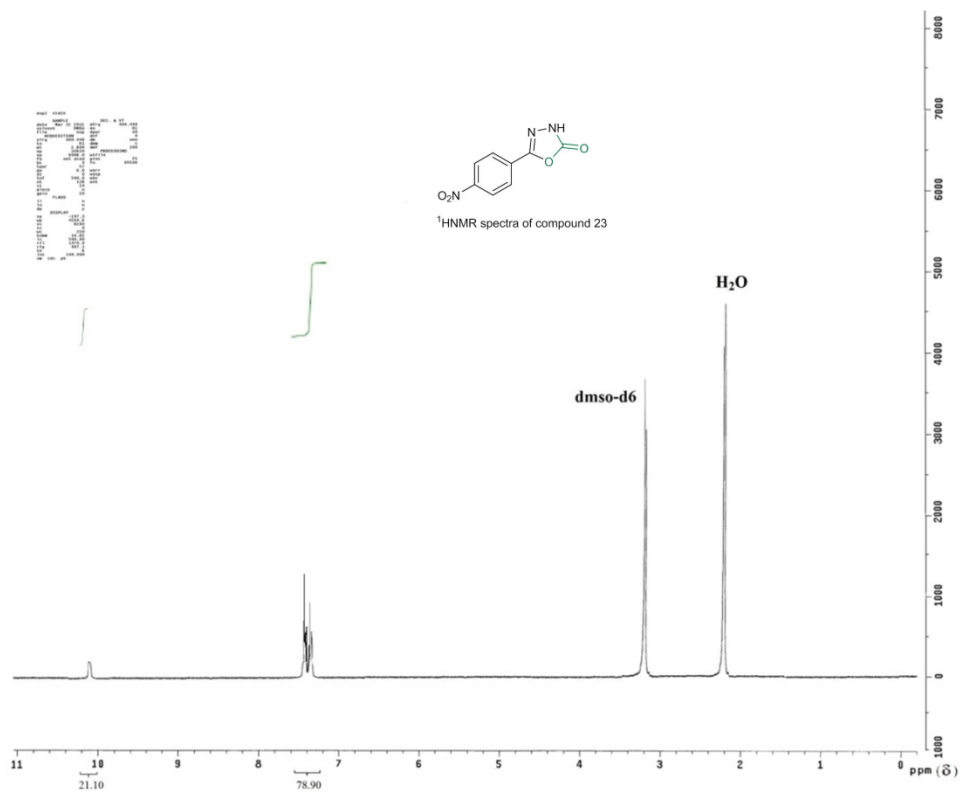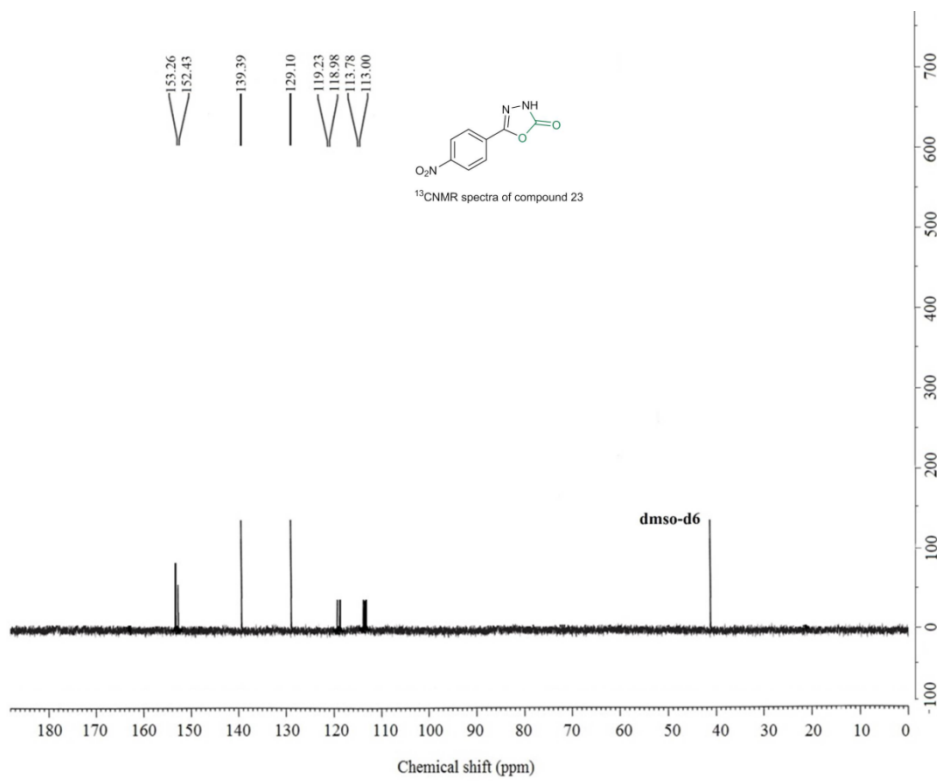

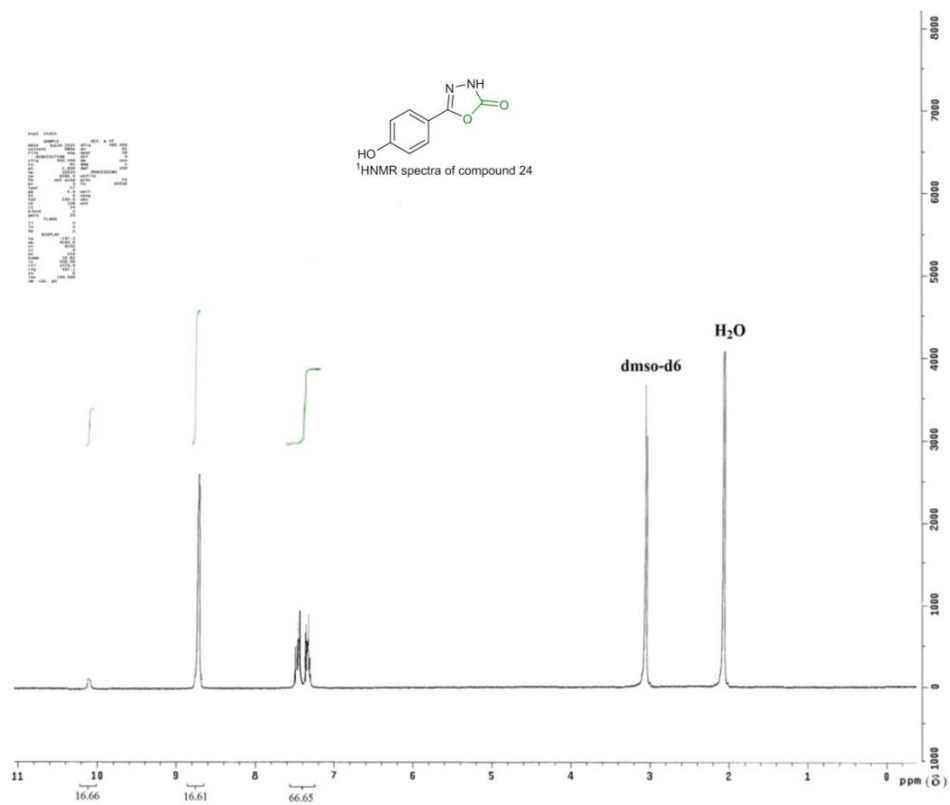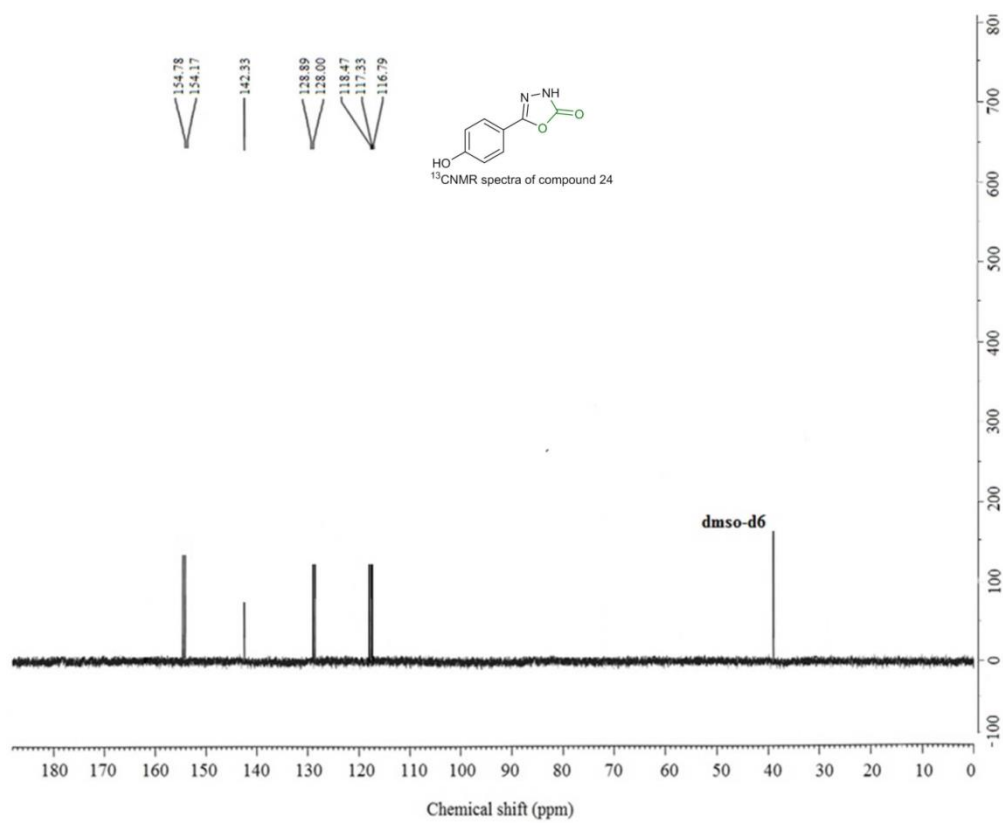

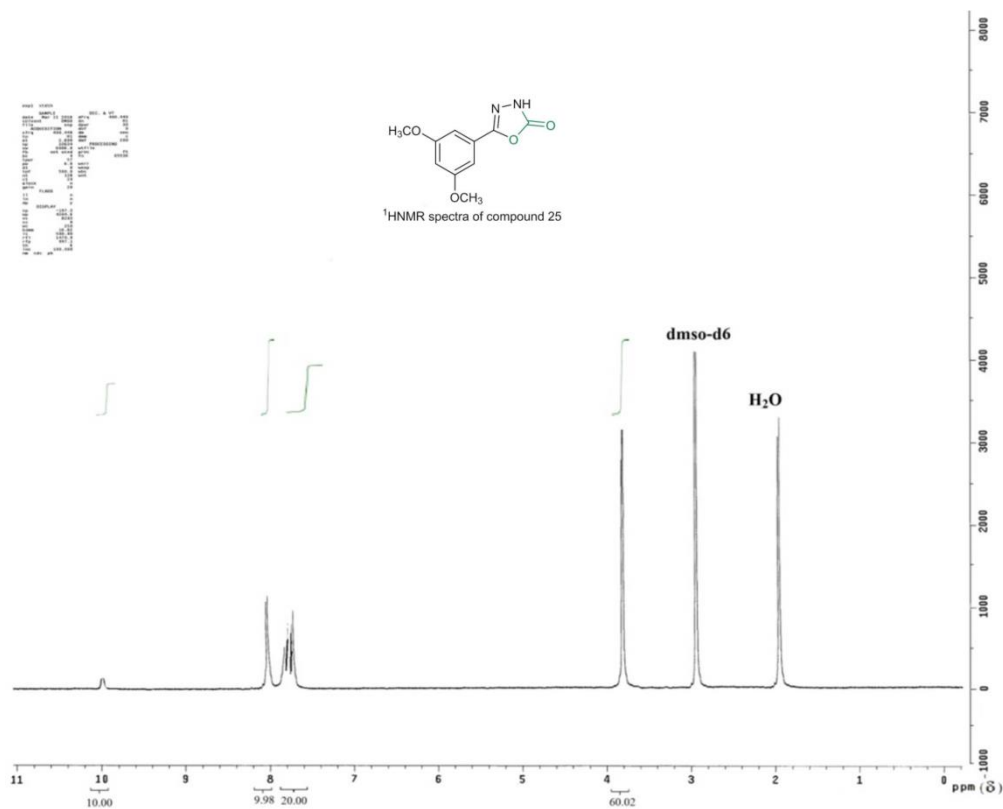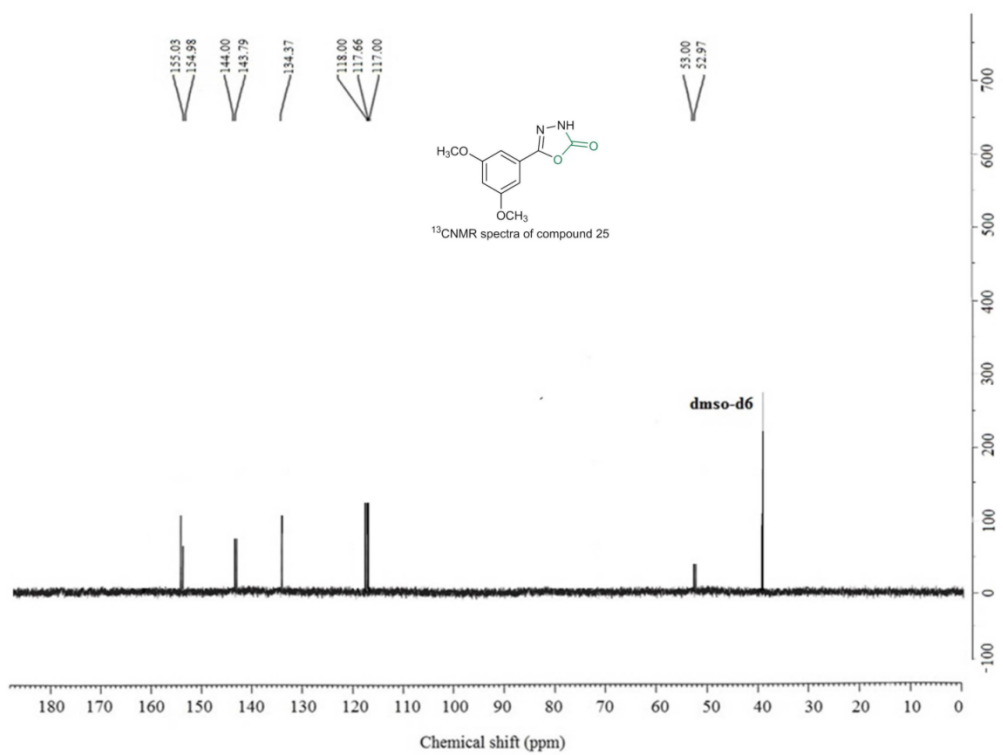

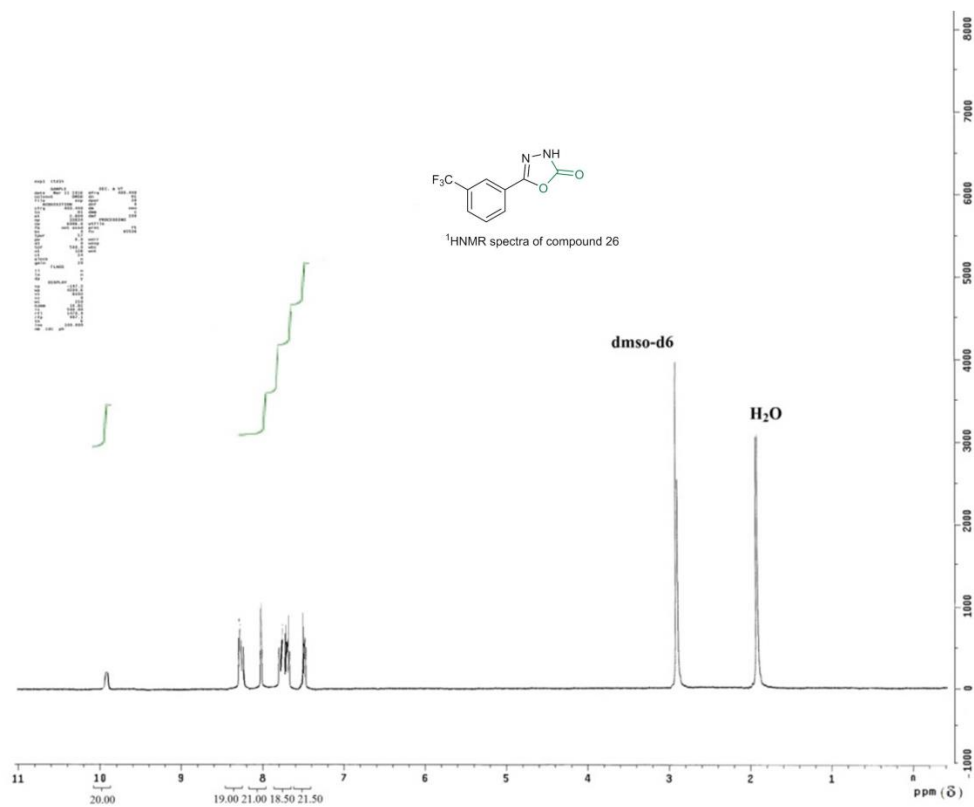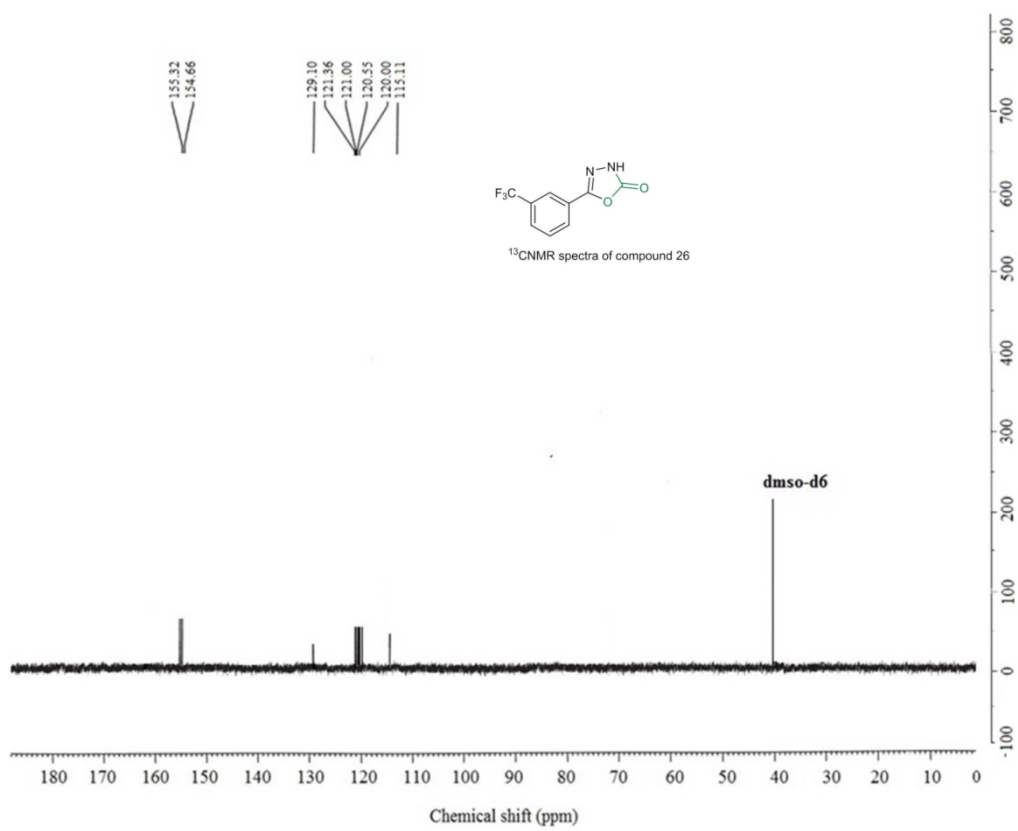

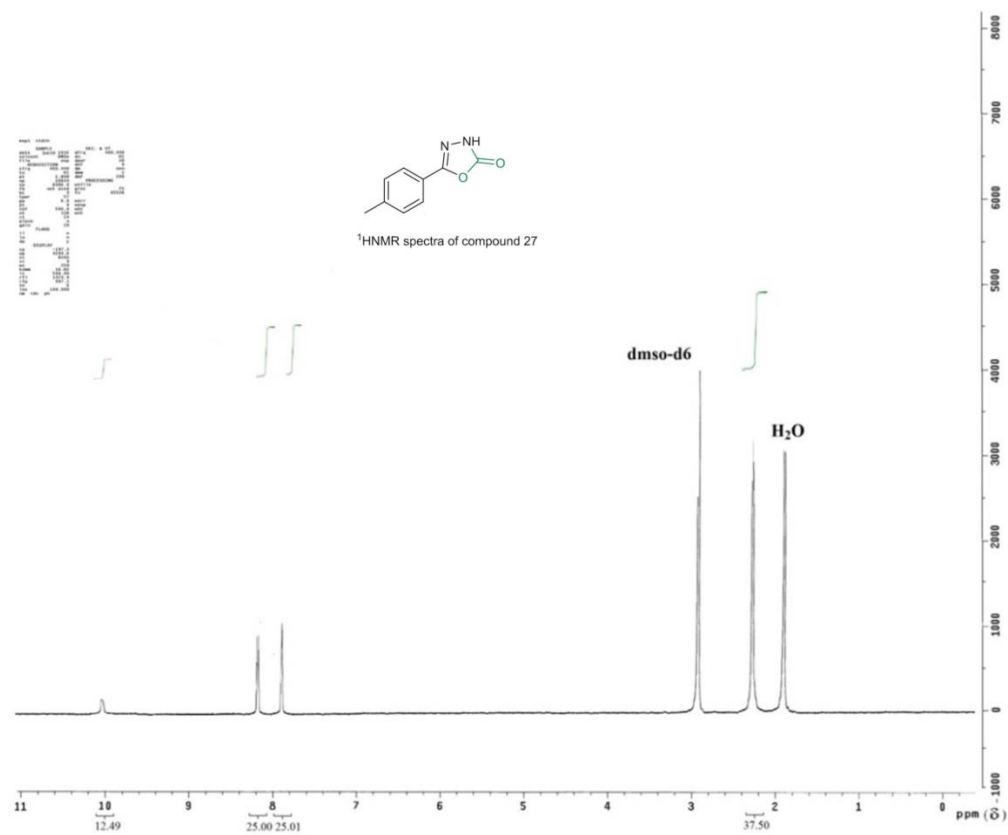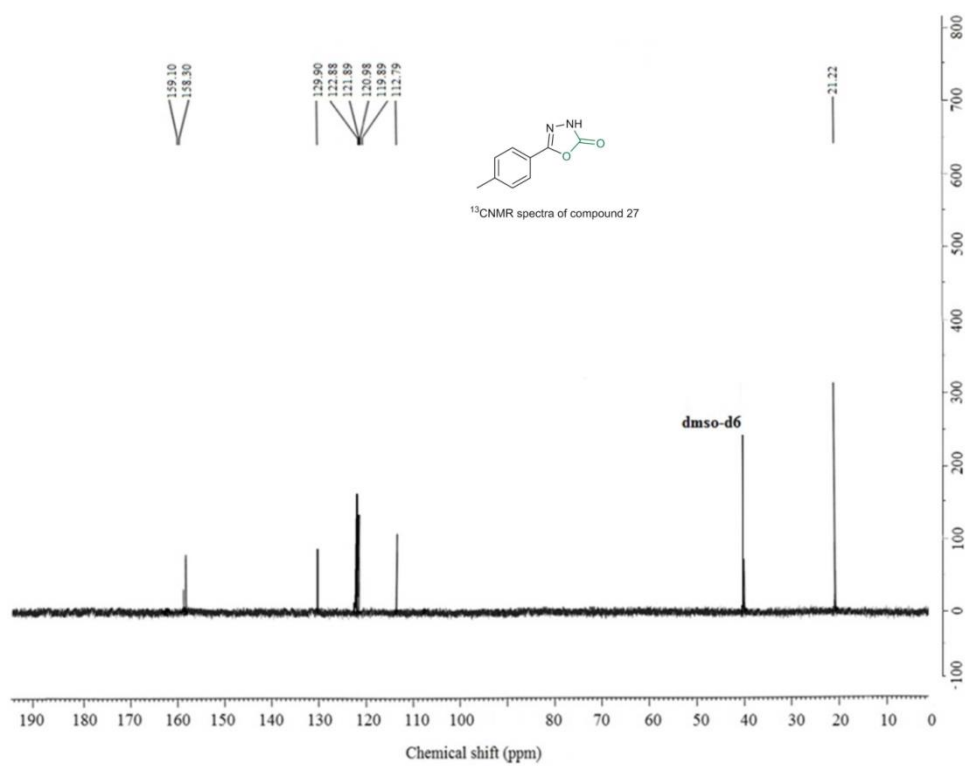

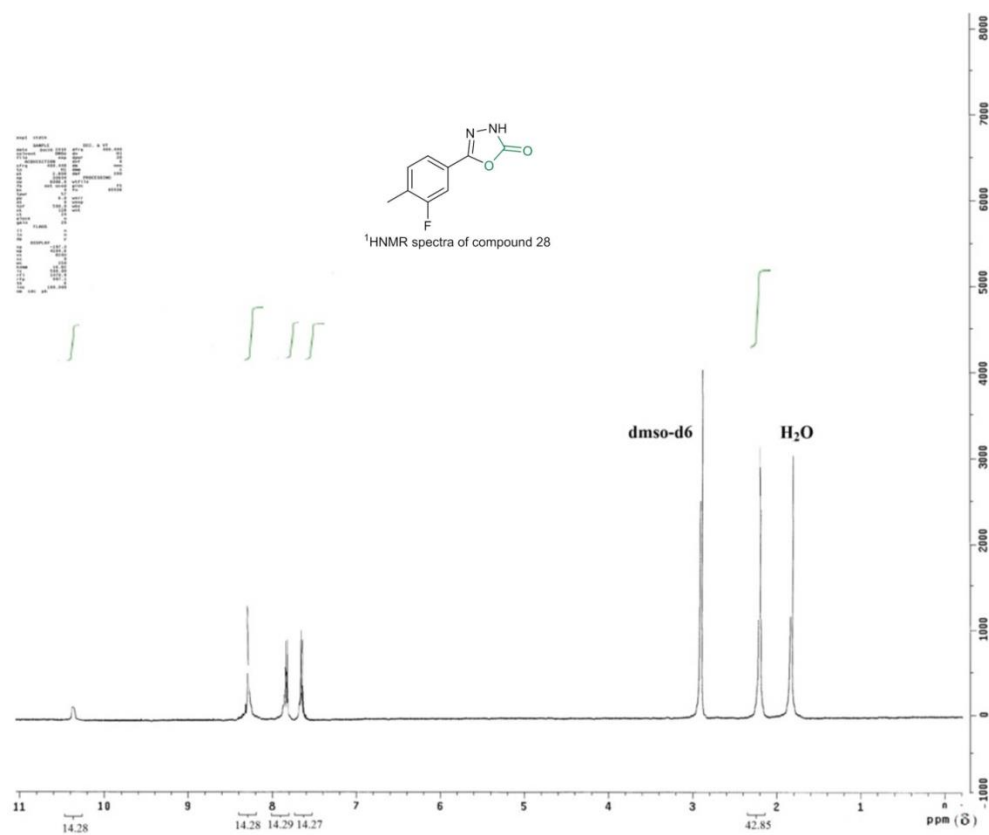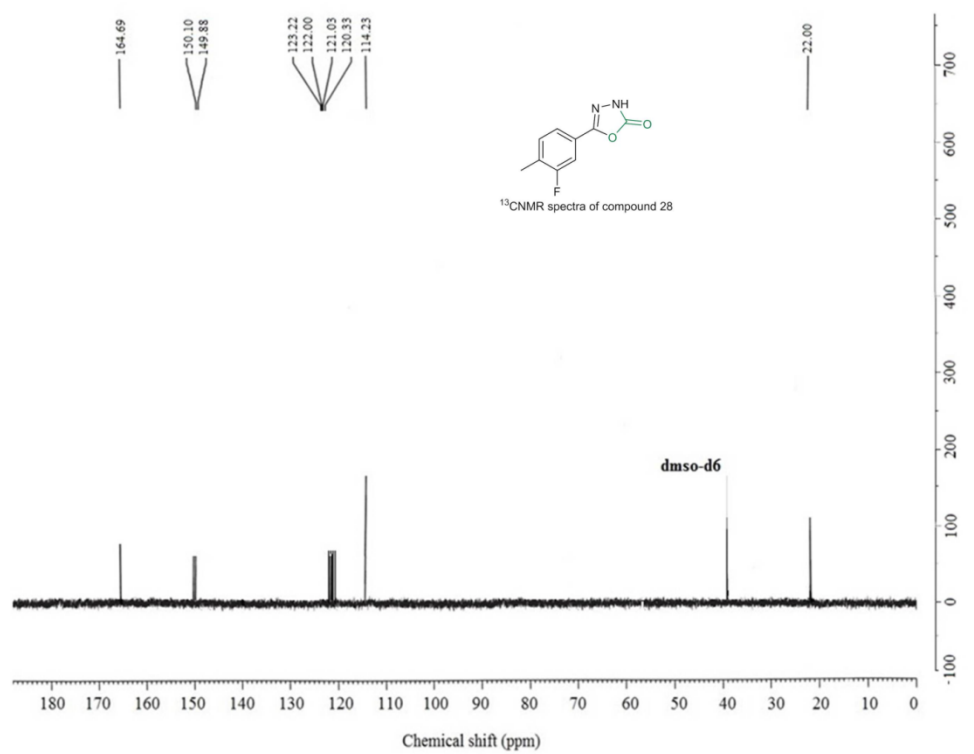



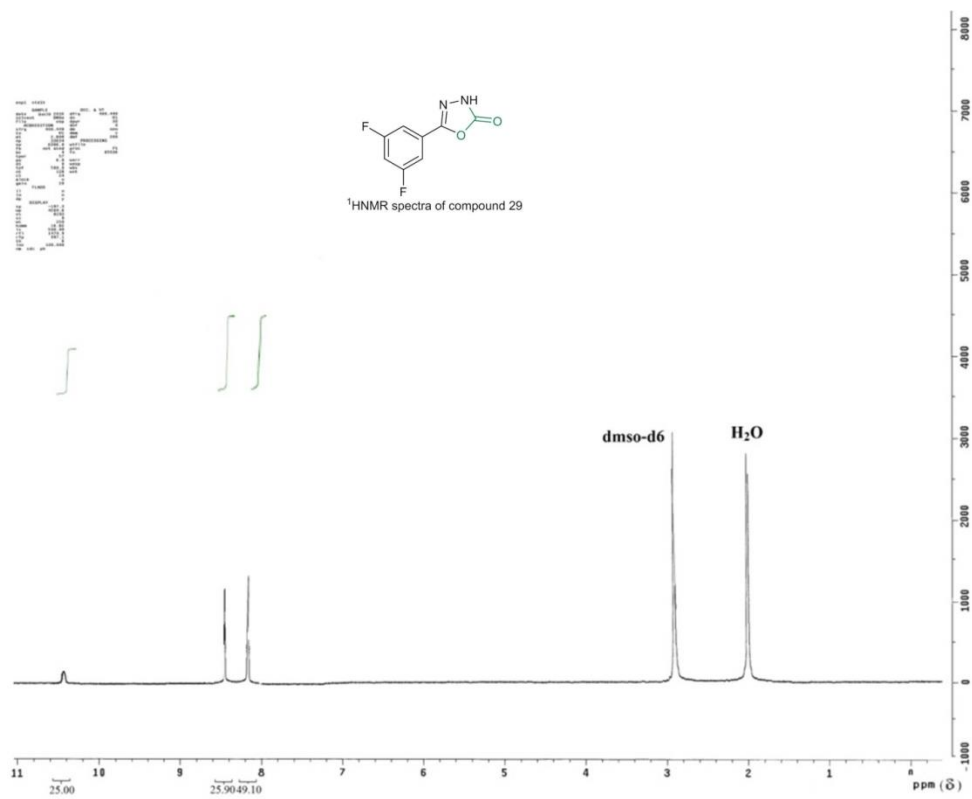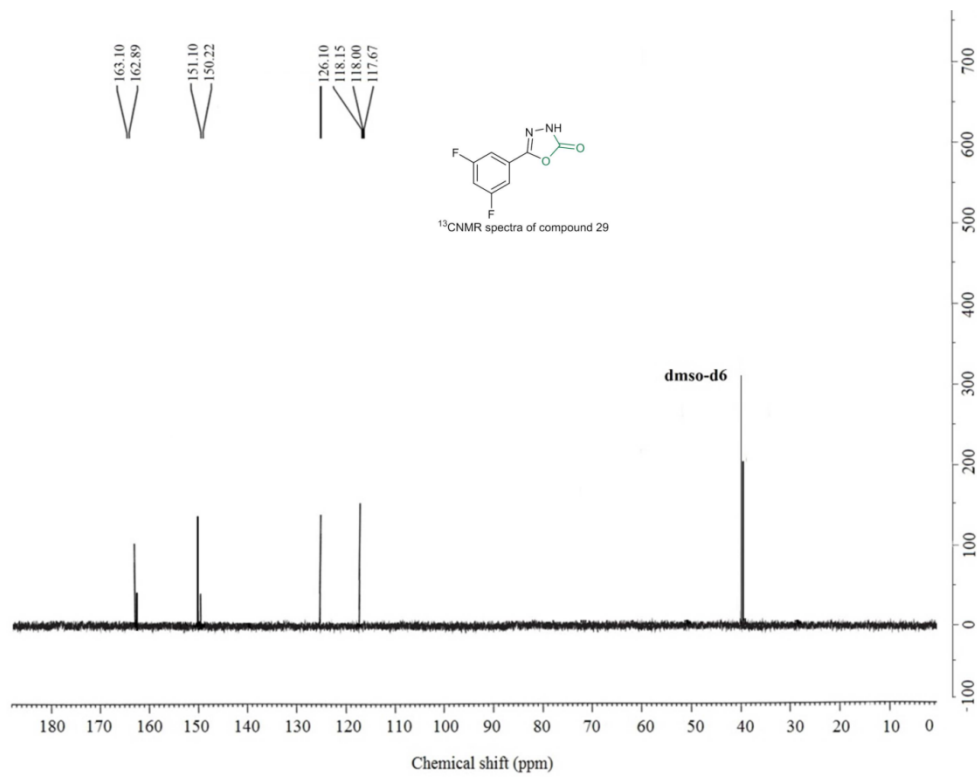

Supplement: 41598_2017_4143_MOESM1_ESM.pdf [file 41598_2017_4143_MOESM1_ESM.pdf]
